# Supplementary material for: Co-Design of a Consultation Audio-Recording Mobile App for People With Cancer: The SecondEars App
Source: PubMed Central journal article supplement (PMC6434400; doi:10.2196/11111), 2019-03-12

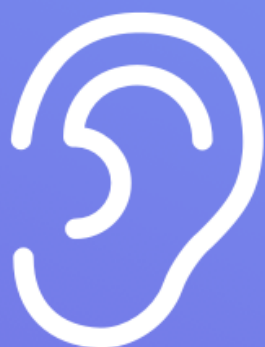

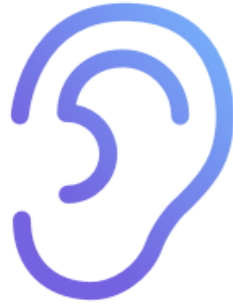

## Second Ears

The Peter MacCallum Cancer Centre's Second Ears app helps you record and recall conversations between you and your clinicians. You never have to worry about missing something important, and you can share it with your family and carers too.

[Start](#)

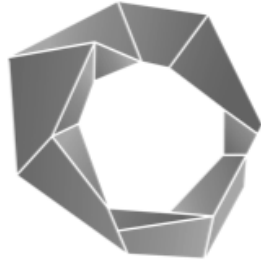

# Peter Mac

Peter MacCallum Cancer Centre  
Victoria Australia

PURN

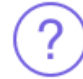

Full Name

Date of Birth

[Sign in](#)

[Help](#)

## 1. Record

When you go in to your consultation use the Second Ears app to record your conversation.

## 2. Upload

After you've finished recording it will need to be uploaded to the hospital. Choose when it suits you to upload.

## 3. Listen

Once the recording is uploaded you can listen to your recording and take notes to help you remember information.

## 4. Share

Play the recording to family members and carers, or send them a copy too.

Remember: This recording is your responsibility once shared outside of the Second Ears app - much like if you took a copy of your medical record outside of the hospital!

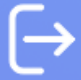

Logout

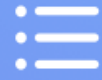

Recordings

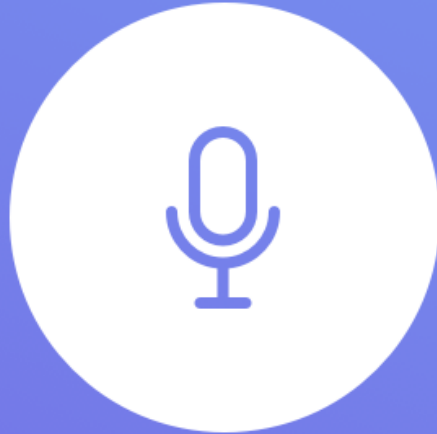

Record

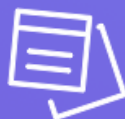

Notes

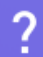

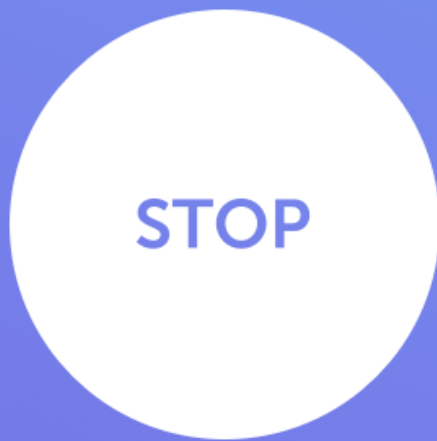

Recording...  
0:05

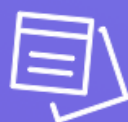

Notes

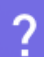

## Notes

23 May 2017 - 10:08 AM

Dietician ●●

Lorem ipsum dolor sit amet, consectetur adipiscing elit. Vestibulum nisl nulla, facilisis sed massa eu, vestibulum posuere.

---

23 May 2017 - 9:26 AM

Radiologist ●

Lorem ipsum dolor sit amet, consectetur adipiscing elit. Vestibulum nisl nulla, facilisis sed massa eu, vestibulum posuere mi. Morbi eu augue rhoncus, lobortis erat nec, tempor magna. Nam molestie rhoncus.

---

18 March 2017 - 12:32 PM

Physio

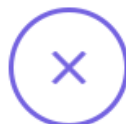

Close

## Recording 0:05

23 May 2017 - 10:08 AM

Dietician ●

Lorem ipsum dolor sit amet, consectetur adipiscing elit. Vestibulum nisl nulla, facilisis sed massa eu, vestibulum posuere.

---

23 May 2017 - 9:26 AM

Radiologist

Lorem ipsum dolor sit amet, consectetur adipiscing elit. Vestibulum nisl nulla, facilisis sed massa eu, vestibulum posuere mi. Morbi eu augue rhoncus, lobortis erat nec, tempor magna. Nam molestie rhoncus.

---

18 March 2017 - 12:32 PM

Physio

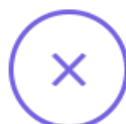

Close



[Back](#)

## Recordings

---

23 May 2017 - 10:08 AM

Dietician  

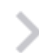

---

23 May 2017 - 9:26 AM

Radiologist 

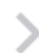

---

18 March 2017 - 12:32 PM

Physio

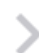

---

2 January 2017 - 10:02 AM

Nurse

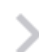

---

12 December 2016 - 3:23 PM

Dietician

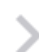

Back

## Recordings

1 June 2017 - 9:28 AM

UPLOAD

23 May 2017 - 10:08 AM

Dietician  

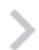

23 May 2017 - 9:26 AM

Radiologist 

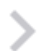

18 March 2017 - 12:32 PM

Physio

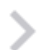

2 January 2017 - 10:02 AM

Nurse

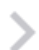

12 December 2016 - 3:23 PM

Dietician

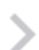

Back

## Recordings

1 June 2017 - 9:28 AM

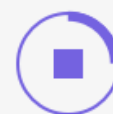

23 May 2017 - 10:08 AM

Dietician  

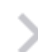

23 May 2017 - 9:26 AM

Radiologist 

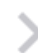

18 March 2017 - 12:32 PM

Physio

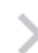

2 January 2017 - 10:02 AM

Nurse

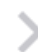

12 December 2016 - 3:23 PM

Dietician

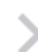

Back

# Recordings

1 June 2017 - 9:28 AM

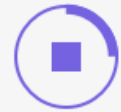

23 May 2017 - 10:08 AM

Dietician ● ●

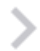

2017 - 9:26 AM

ist ●

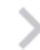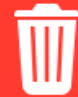

Delete

18 March 2017 - 12:32 PM

Physio

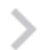

2 January 2017 - 10:02 AM

Nurse

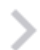

12 December 2016 - 3:23 PM

Dietician

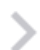

Back

# Recordings

1 June 2017 - 9:28 AM

UPLOAD

23 May 2017 - 10:08 AM

Dietician ●●

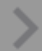

23 M

Radi

**This recording is not available yet**

In order to listen to this recording, it must be uploaded to the hospital first. Press upload to begin.

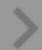

18 M

Phys

OK

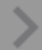

2 January 2017 - 10:02 AM

Nurse

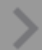

12 December 2016 - 3:23 PM

Dietician

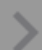

Back

# Recordings

1 June 2017 - 9:28 AM

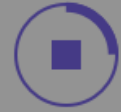

23 May 2017 - 10:08 AM

Dietician ● ●

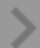

23 M

Radi

**This recording is currently uploading**

In order to listen to this recording, it must be uploaded to the hospital first. Please wait for upload to finish.

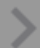

18 M

Phys

OK

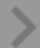

2 January 2017 - 10:02 AM

Nurse

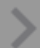

12 December 2016 - 3:23 PM

Dietician

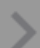

Back

# Recordings

1 June 2017 - 10:08 AM

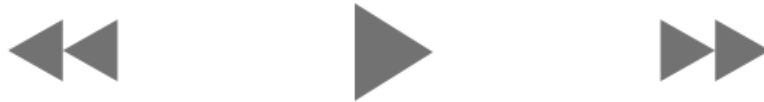

16:12

-19:48

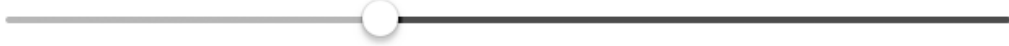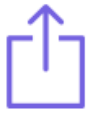

Share

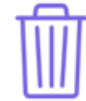

Delete

Who

Dietician >

Tags

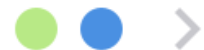

Notes

Enter your notes here...

Back

# Recordings

1 June 2017 - 10:08 AM

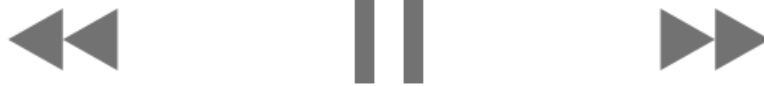

16:12

-19:48

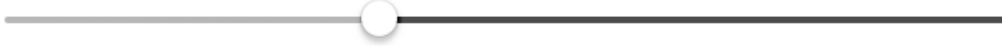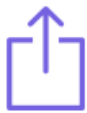

Share

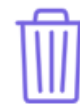

Delete

Who

Dietician >

Tags



Notes

Enter your notes here...



Back

# Recordings

1 June 2017 - 10:08 AM

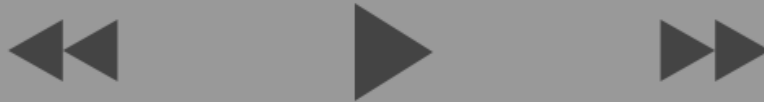

16:12

-19:48

## Share safely!

Sharing your recordings means it is no longer secure in the app. Make sure you are only sending it to people you know and trust.

Cancel

Share

Who

Tags

Notes

Enter your notes here...

Back

# Who

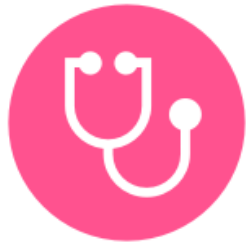

Doctor

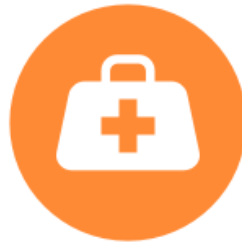

Nurse

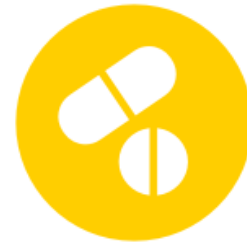

Pharmacist

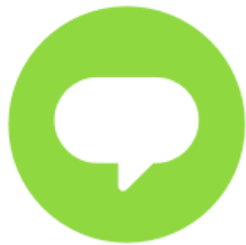

Social  
Worker

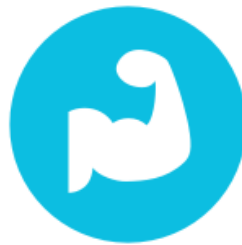

Physio-  
therapist

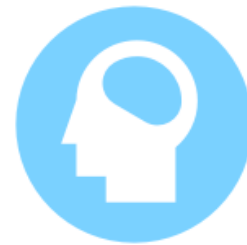

Psychologist

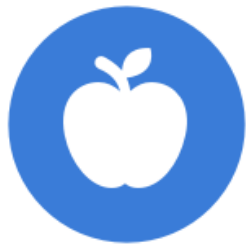

Dietician

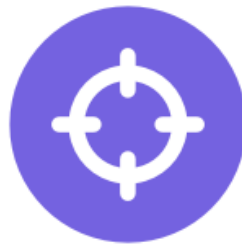

Radiation  
Therapist

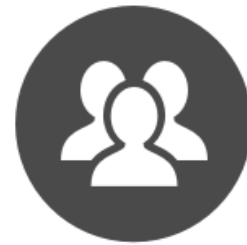

Other

Back

# Who

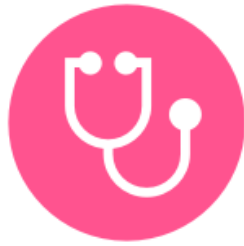

Doctor



Nurse



Pharmacist

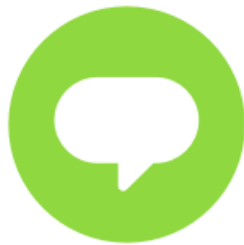

Social  
Worker

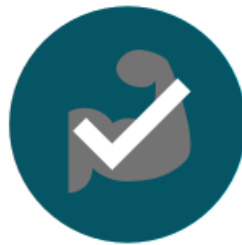

Physio-  
therapist



Psychologist

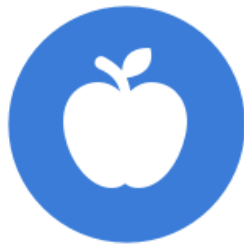

Dietician



Radiation  
Therapist



Other

Back

# Tags

ADD TAG

Red

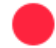

Orange

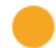

Yellow

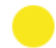

✓ Green

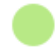

✓ Blue

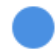

Purple

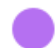

Grey

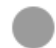

Supplement: formative_v3i1e11111_app1.pdf [file formative_v3i1e11111_app1.pdf]
